# Supplementary material for: Microwave-assisted synthesis, crystal structure and properties of a disc-like heptanuclear Co(II) cluster and a heterometallic cubanic Co(II) cluster
Source: Royal Society of Chemistry journal article supplement (doi:10.1039/b815675a), 2009-01-01
Supplement: b815675a.pdf [file b815675a.pdf]

## Electronic Supporting Information (ESI)

Microwave-Assisted Synthesis, Crystal Structure and Properties of a disc-like heptanuclear cobalt (II) cluster  $[\text{Co}_7(\text{immp})_6(\text{CH}_3\text{O})_6]\cdot 2\text{ClO}_4$  and a tetranuclear Heterometallic cubanic Cluster  $[\text{NaCo}_3(\text{L})_3(\text{CH}_3\text{CN})_3(\text{OH})]_2\cdot\text{CH}_3\text{CN}$

Shu-Hua Zhang,<sup>†,‡</sup> You Song<sup>†</sup>, Hong Liang,<sup>\*†,‡</sup> Ming-Hua Zheng<sup>‡</sup>

<sup>†</sup> State Key Laboratory of Coordination Chemistry, Nanjing University, Nanjing 210093 People's Republic of China

<sup>‡</sup> Department of Chemistry and Chemical Engineering, Guangxi Normal University, Guilin 541004 People's Republic of China

\*Corresponding authors. E-mail: hongliangby1@yahoo.com.cn. Fax: Int. code +86 773 5896-672

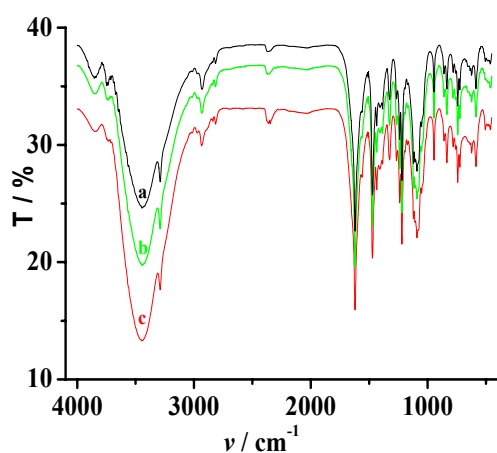

**Fig. S1** IR spectrum of different methods synthesis **1**. a: method A; b: method B; c: method C.

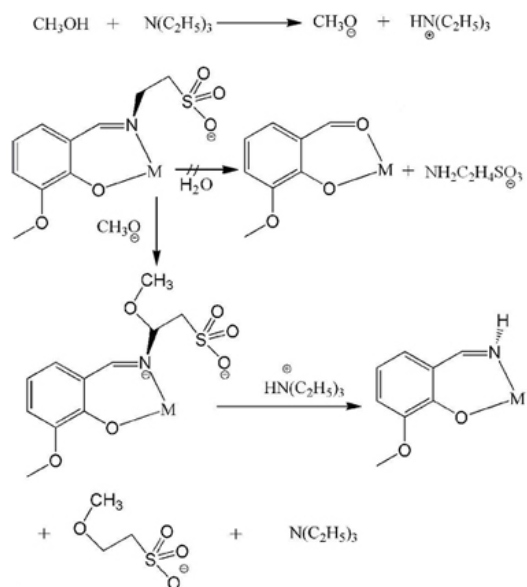

**Scheme S1.** The probable mechanism of the formation for ligand impmp.

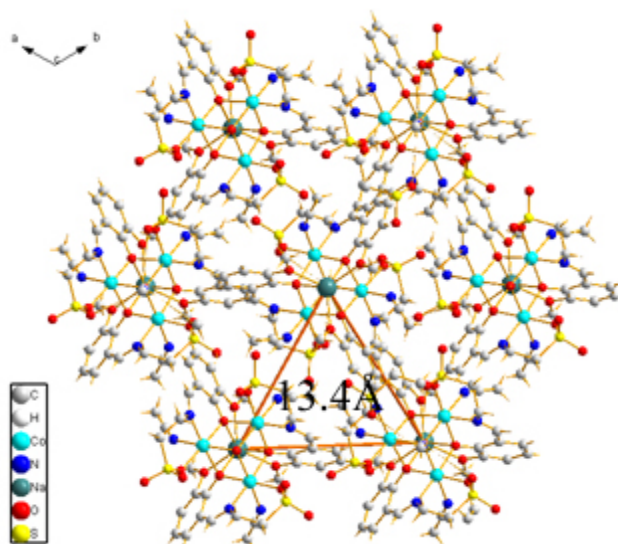

**Fig. S2** Packing diagram of structure 2.

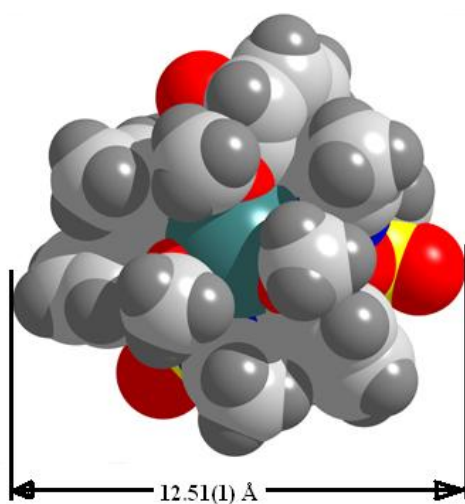

Fig. S3 Space-filling plot of 2.

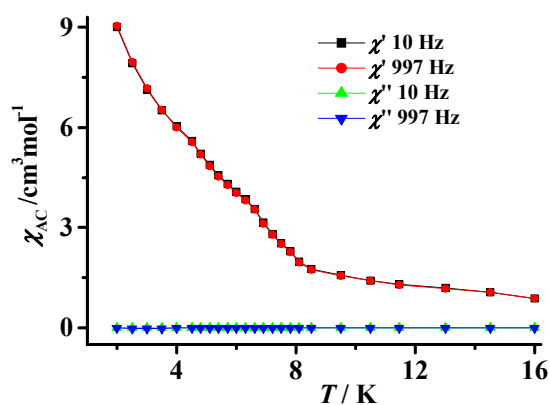

Fig. S4 Plot of ac susceptibility shown as  $\chi'$  vs  $T$  and  $\chi''$  vs  $T$  for 1.

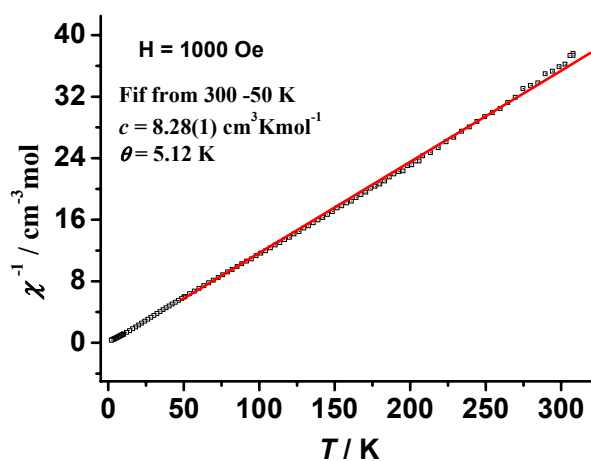

Fig. S5 Plot of  $\chi^{-1}$  vs  $T$  for 2.

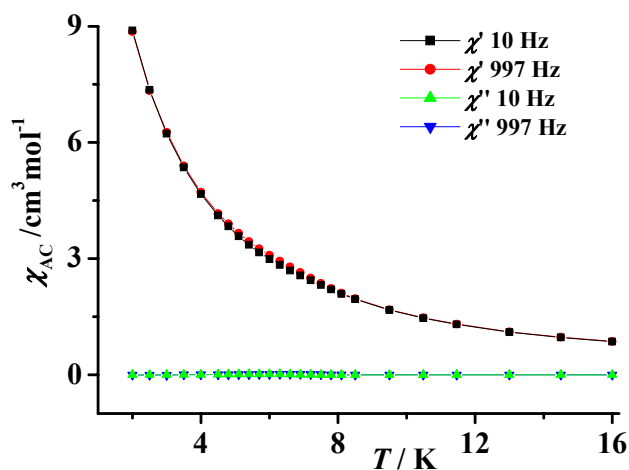

**Fig. S6** Plot of ac susceptibility shown as  $\chi'$  vs  $T$  and  $\chi''$  vs  $T$  for **2**.

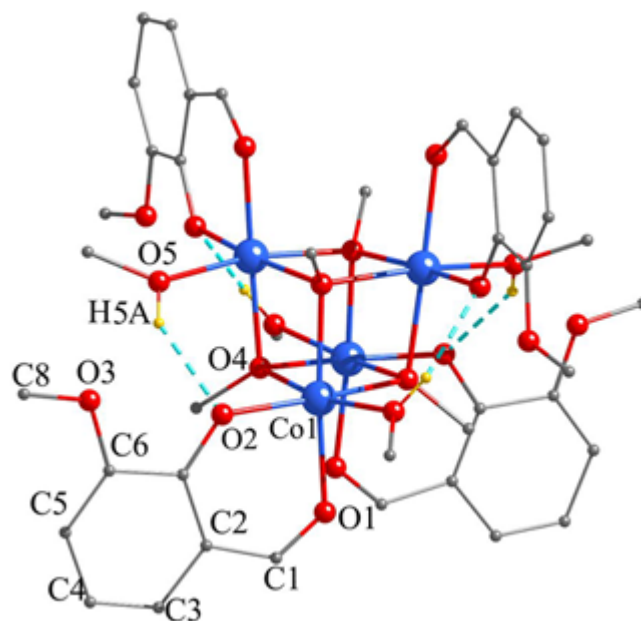

**Fig. S7** The structure of cluster **a**, non-hydrogen bonds hydrogen atoms omitted.
